# Supplementary material for: Normalized Workflow to Optimize Hybrid De Novo Transcriptome Assembly for Non-Model Species: A Case Study in Lilium ledebourii (Baker) Boiss
Source: MDPI journal article supplement (doi:10.3390/plants11182365), 2022-09-10
Supplement: s1 [file s1]

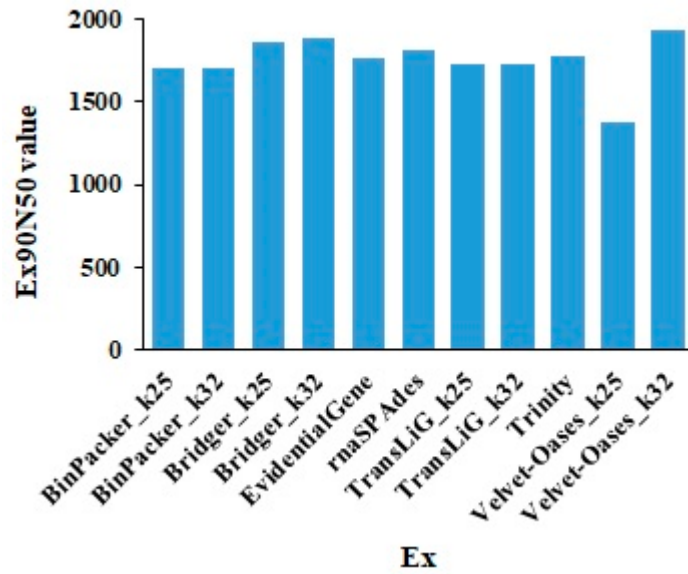

Figure S1. Results for Ex90N50 statistic.

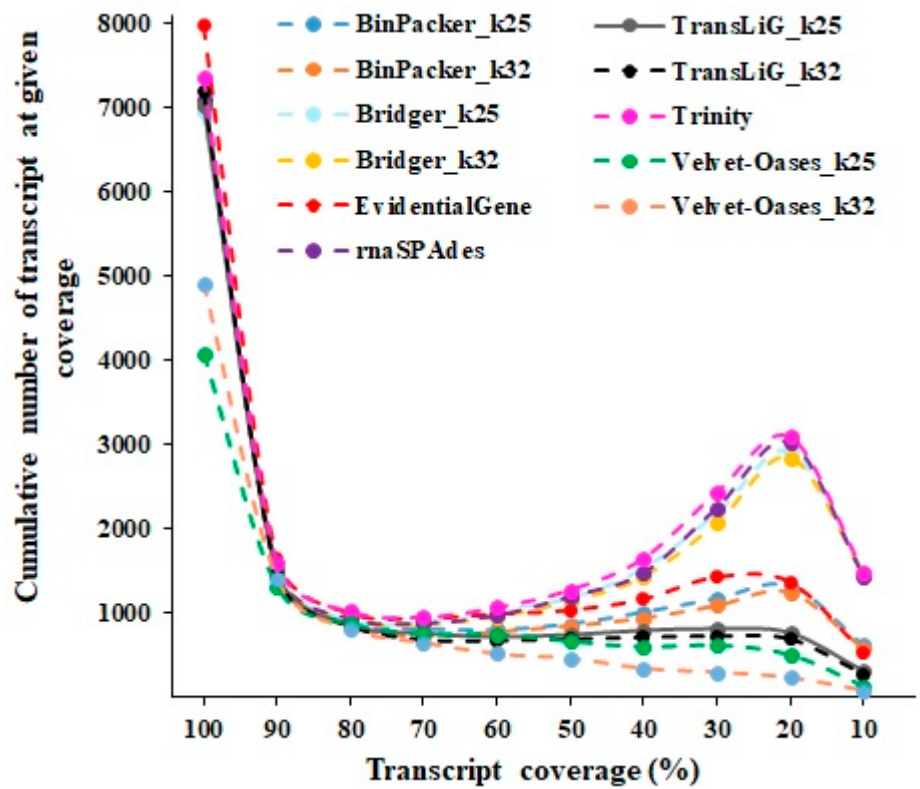

Figure S2. Cumulative number of genes that have been aligned to the Swiss-Prot database at a given coverage.

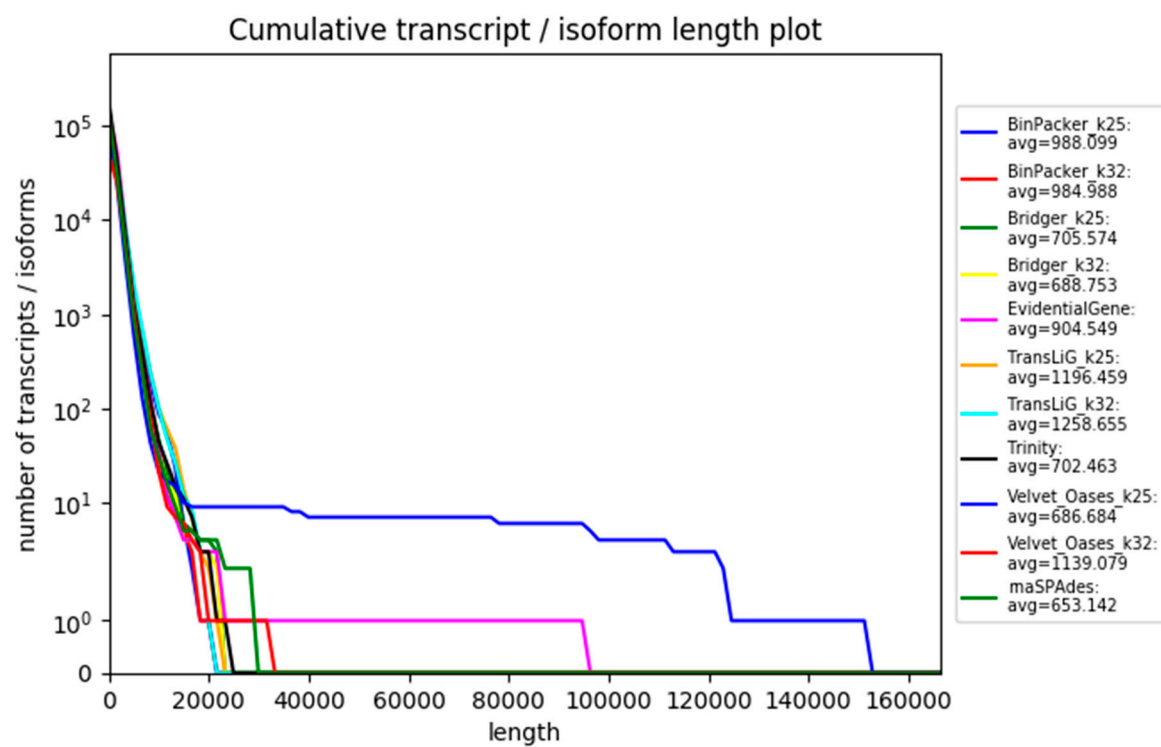

**Figure S3.** Transcripts length and the number of transcripts per isoform among assemblies.
