# Supplementary material for: Normalized Workflow to Optimize Hybrid De Novo Transcriptome Assembly for Non-Model Species: A Case Study in Lilium ledebourii (Baker) Boiss
Source: MDPI journal article supplement (doi:10.3390/plants11182365), 2022-09-10
Supplement: s1 [file s1]

TableS1. RNA-Quast statistical output comparison for 11 assemblies.

|                         | <b>Transcripts</b> | <b>Transcripts<br/>&gt; 500 bp</b> | <b>Transcripts<br/>&gt; 1000 bp</b> | <b>Average length of<br/>assembled<br/>transcripts</b> | <b>Longest<br/>transcript</b> | <b>Total<br/>length</b> | <b>Transcript<br/>N50</b> |
|-------------------------|--------------------|------------------------------------|-------------------------------------|--------------------------------------------------------|-------------------------------|-------------------------|---------------------------|
| <b>BinPacker_k25</b>    | 89964              | 55360                              | 29967                               | 988.099                                                | 19317                         | 88893311                | 1531                      |
| <b>BinPacker_k32</b>    | 85508              | 52472                              | 28445                               | 984.988                                                | 19205                         | 84224352                | 1541                      |
| <b>Bridger_k25</b>      | 135912             | 50605                              | 27667                               | 705.574                                                | 21345                         | 95895929                | 1281                      |
| <b>Bridger_k32</b>      | 134866             | 47839                              | 26617                               | 688.753                                                | 20923                         | 92889346                | 1275                      |
| <b>EvidentialGene</b>   | 145009             | 78689                              | 43150                               | 904.549                                                | 94676                         | 131167799               | 1442                      |
| <b>rnaSPAdes</b>        | 134203             | 43405                              | 24568                               | 653.142                                                | 28684                         | 87653551                | 1186                      |
| <b>TransLiG_k25</b>     | 78383              | 58462                              | 33319                               | 1196.459                                               | 21456                         | 93782052                | 1738                      |
| <b>TransLiG_k32</b>     | 74697              | 57617                              | 34022                               | 1258.655                                               | 19205                         | 94017735                | 1805                      |
| <b>Trinity</b>          | 174486             | 64997                              | 35270                               | 702.463                                                | 22754                         | 122570012               | 1231                      |
| <b>Velvet_Oases_k25</b> | 85555              | 32730                              | 18933                               | 686.684                                                | 151112                        | 58749266                | 1397                      |
| <b>Velvet_Oases_k32</b> | 49349              | 29996                              | 21679                               | 1139.079                                               | 30783                         | 56212403                | 1931                      |
