# Supplementary material for: Normalized Workflow to Optimize Hybrid De Novo Transcriptome Assembly for Non-Model Species: A Case Study in Lilium ledebourii (Baker) Boiss
Source: Plants (Basel). 2022 Sep 10;11(18):2365. doi: 10.3390/plants11182365 (PMC9503428; doi:10.3390/plants11182365)
Supplement: Supplementary file 1 [file plants-11-02365-s001.zip › Table S2.xlsx]

## Sheet: Sheet2
Table S2. TransRate statistical output comparison for assemblies.
	n_seqs	smallest	largest	n_bases	mean_len	n_over_1k	n_over_10k	n_with_orf	mean_orf_percent	n90	n70	n50	n30	n10	gc
BinPacker_k25	89964	200	19317	88893311	988.099	29936	70	33921	60.2123	437	927	1531	2272	3955	0.45958
BinPacker_k32	85508	200	19205	84224352	984.988	28414	17	32511	60.9663	436	928	1541	2255	3898	0.4603
Bridger_k25	135912	201	21345	95895929	705.574	27631	28	31389	61.8465	258	611	1281	2063	3543	0.45607
Bridger_k32	134866	200	20923	92889346	688.753	26596	24	30031	62.6488	251	586	1275	2053	3550	0.45704
EvidentialGene	145009	101	94676	131167799	903.855	43111	23	57814	68.6179	376	834	1444	2132	3650	0.4696
rnaSPAdes	134203	184	28684	87653551	652.197	24549	21	27787	63.1624	253	505	1190	1939	3377	0.45957
TransLiG_k25	78383	200	21456	93782052	1196.46	33286	77	36328	58.0177	565	1117	1738	2549	4349	0.45952
TransLiG_k32	74697	200	19205	94017735	1258.65	33986	63	36655	58.0563	599	1192	1805	2610	4528	0.46048
Trinity	174486	187	22754	122570012	702.457	35235	34	40993	62.9072	271	582	1231	1970	3434	0.45743
Velvet-Oases_k25	85555	100	151112	58749266	639.748	18917	18	24407	66.3287	415	996	1614	2423	5585	0.46478
Velvet-Oases_k32	49349	100	30783	56212403	1110.13	21666	13	23030	61.1092	734	1450	2013	2809	4618	0.46536
